# Supplementary material for: Evidence for an ancient BRCA1 pathogenic variant in inherited breast cancer patients from Senegal
Source: PubMed Central journal article supplement (PMC6994613; doi:10.1038/s41525-020-0114-7), 2020-01-31
Supplement: 41525_2020_114_MOESM1_ESM.pdf [file 41525_2020_114_MOESM1_ESM.pdf]

**Supplementary Table I:** Primers used for BRCA1 coding exons PCR amplification

| Exon | Primers            |                                              | Fragment Length (bp) |
|------|--------------------|----------------------------------------------|----------------------|
|      | Primer F           | Primer R                                     |                      |
| 2    | TGTA AACGACGGCCAGT | CAGGAAACAGCTATGACCTCTTTTCTCCCTAGTATGTAAGGTCA | 350                  |
| 3    | TGTA AACGACGGCCAGT | CAGGAAACAGCTATGACCAAGTTAGGTGTTTCTGGGTTATG    | 315                  |
| 5    | TGTA AACGACGGCCAGT | CAGGAAACAGCTATGACCTCTACTTTTTCTACTGTGG        | 232                  |
| 6    | TGTA AACGACGGCCAGT | CAGGAAACAGCTATGACCACCACGTCATAGAAAGTAATTGT    | 312                  |
| 7    | TGTA AACGACGGCCAGT | CAGGAAACAGCTATGACCCCCAGCTACTAAGGGGGCTA       | 370                  |
| 8    | TGTA AACGACGGCCAGT | CAGGAAACAGCTATGACCCACTTCCCAAAGCTGCCTAC       | 315                  |
| 9    | TGTA AACGACGGCCAGT | CAGGAAACAGCTATGACCTGCACATACATCCCTGAACC       | 312                  |
| 10   | TGTA AACGACGGCCAGT | CAGGAAACAGCTATGACCGTATCTACCCACTCTCTTTTCAG    | 259                  |
| 11T1 | TGTA AACGACGGCCAGT | CAGGAAACAGCTATGACCCATCACTTCTGGAAAACCACTC     | 610                  |
| 11T2 | TGTA AACGACGGCCAGT | CAGGAAACAGCTATGACCGAATAGAATCACCTTTTGTTT      | 670                  |
| 11T3 | TGTA AACGACGGCCAGT | CAGGAAACAGCTATGACCGACACTTTAACTGTTTCTAG       | 621                  |
| 11T4 | TGTA AACGACGGCCAGT | CAGGAAACAGCTATGACCATTAGACTCATTCTTTCTTG       | 634                  |
| 11T5 | TGTA AACGACGGCCAGT | CAGGAAACAGCTATGACCCCTAATCTAAGCATAGCATT       | 605                  |
| 11T6 | TGTA AACGACGGCCAGT | CAGGAAACAGCTATGACCCAATGATAATAAATTCCTC        | 620                  |
| 11T7 | TGTA AACGACGGCCAGT | CAGGAAACAGCTATGACCCCTGGAAATTTGTA A AATGTGC   | 494                  |
| 12   | TGTA AACGACGGCCAGT | CAGGAAACAGCTATGACCTGTCAGCAAACCTAAGAATGT      | 280                  |
| 13   | TGTA AACGACGGCCAGT | CAGGAAACAGCTATGACCATGTTGGAGCTAGGTCCTTAC      | 336                  |
| 14   | TGTA AACGACGGCCAGT | CAGGAAACAGCTATGACCAAAACAAAAGAATATCCTAGAGCAA  | 394                  |
| 15   | TGTA AACGACGGCCAGT | CAGGAAACAGCTATGACCGAGCTATTTTTCTAAAGTGGGCTTA  | 451                  |
| 16   | TGTA AACGACGGCCAGT | CAGGAAACAGCTATGACCAAAACTCTTTCCAGAATGTTGT     | 459                  |
| 17   | TGTA AACGACGGCCAGT | CAGGAAACAGCTATGACCACCATGCTGGCCAGGATG         | 386                  |
| 18   | TGTA AACGACGGCCAGT | CAGGAAACAGCTATGACCAAGACCTTTTGTA AACTCAGA     | 290                  |
| 19   | TGTA AACGACGGCCAGT | CAGGAAACAGCTATGACCATTGTTAAGGAAAGTGGTGC       | 262                  |
| 20   | TGTA AACGACGGCCAGT | CAGGAAACAGCTATGACCCTGTGTGAAAGTATCTAGCACTG    | 310                  |
| 21   | TGTA AACGACGGCCAGT | CAGGAAACAGCTATGACCGAACATTTTCAGCAATCTGAGG     | 308                  |
| 22   | TGTA AACGACGGCCAGT | CAGGAAACAGCTATGACCGAACATTTTCAGCAATCTGAGG     | 308                  |
| 23   | TGTA AACGACGGCCAGT | CAGGAAACAGCTATGACCCTGTGCTACTCAAGCACCA        | 312                  |
| 24   | TGTA AACGACGGCCAGT | CAGGAAACAGCTATGACCGAAGGACTGAAGAGTGAGAGGAG    | 404                  |

**Supplementary Table 2:** Fluorescent labelled primers used for microsatellite markers genotyping

| <b>Microsatellite marker</b> | <b>Primer F</b>         | <b>Primer R</b>          | <b>Size(bp)</b> | <b>DYE</b> |
|------------------------------|-------------------------|--------------------------|-----------------|------------|
| D17S1183                     | TTAGCTGTGACCATATTGTATTG | CAATTTAATATGTAGCTAGTGGCT | 165             | 6-FAM      |
| D17S1320                     | ACTTTCCAGAAAATCTCTGCTC  | CCACGTCTTTTCTGTGTTCC     | 180             | HEX        |
| D17S1323                     | TAGGAGATGGATTATTGGTG    | AAGCAACTTTGCAATGAGTG     | 155             | 6-FAM      |
| D17S1325                     | AAAGGTGGCAATTCACAGTTG   | GTGATAAAACTCAGTGGTACTC   | 155             | HEX        |
| D17S1793                     | CCAGCCCAAGGTTTACATC     | CACCAGTTCCTGCGAG         | 163-169         | 6-FAM      |
| D17S855                      | GGATGGCCTTTTAGAAAGTGG   | ACACAGACTTGCCTACTGCC     | 143             | CY3, 5     |
| D17S951                      | GGCCTCCCAAAGTCTT        | TCTACCCCGATGAGCCA        | 170-188         | CY3, 5     |

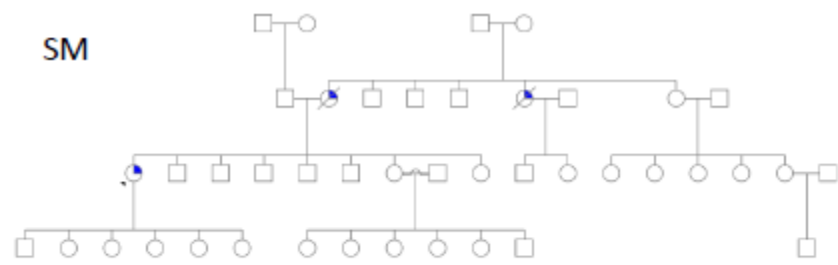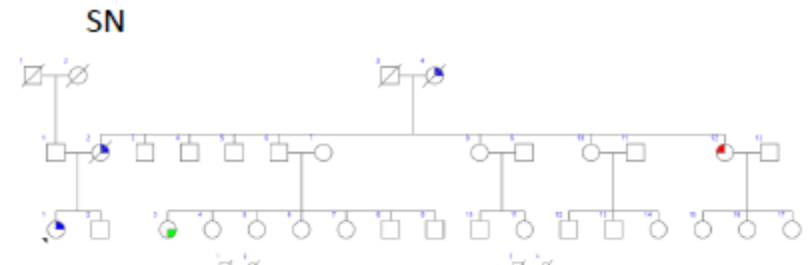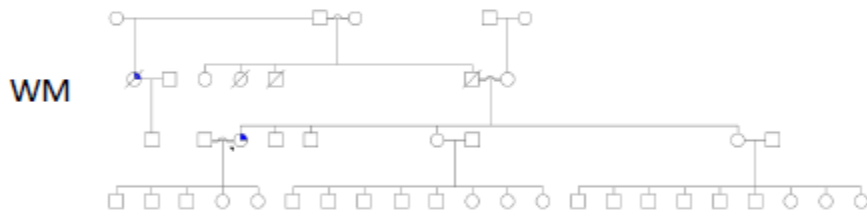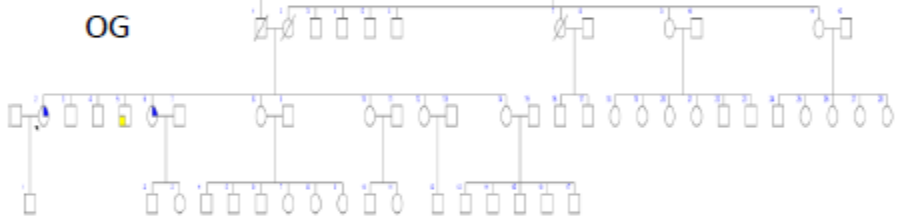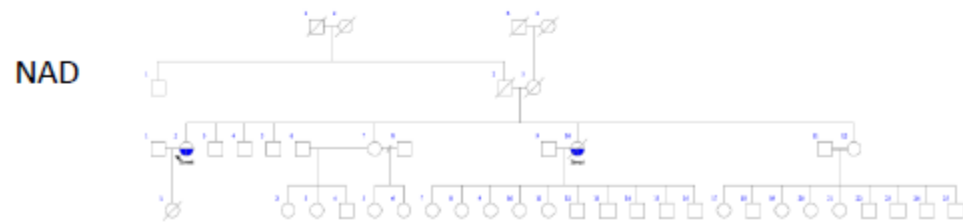

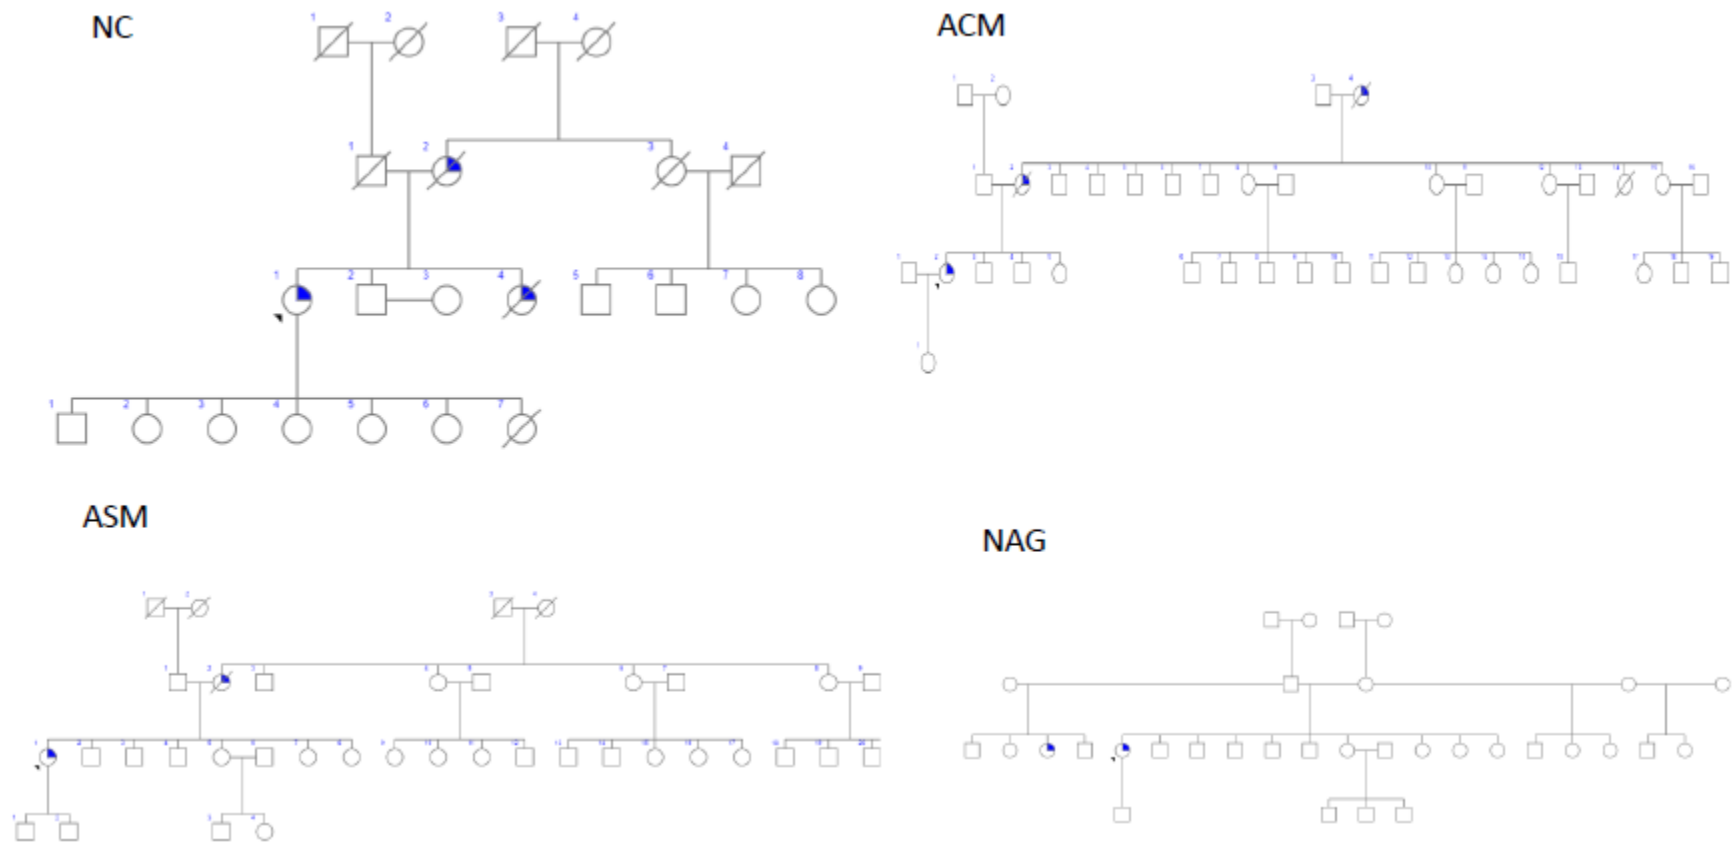

**Supplementary Figure 1:** Pedigrees of the 9 other *BRCA1* mutation carriers identified by PCR genotyping.

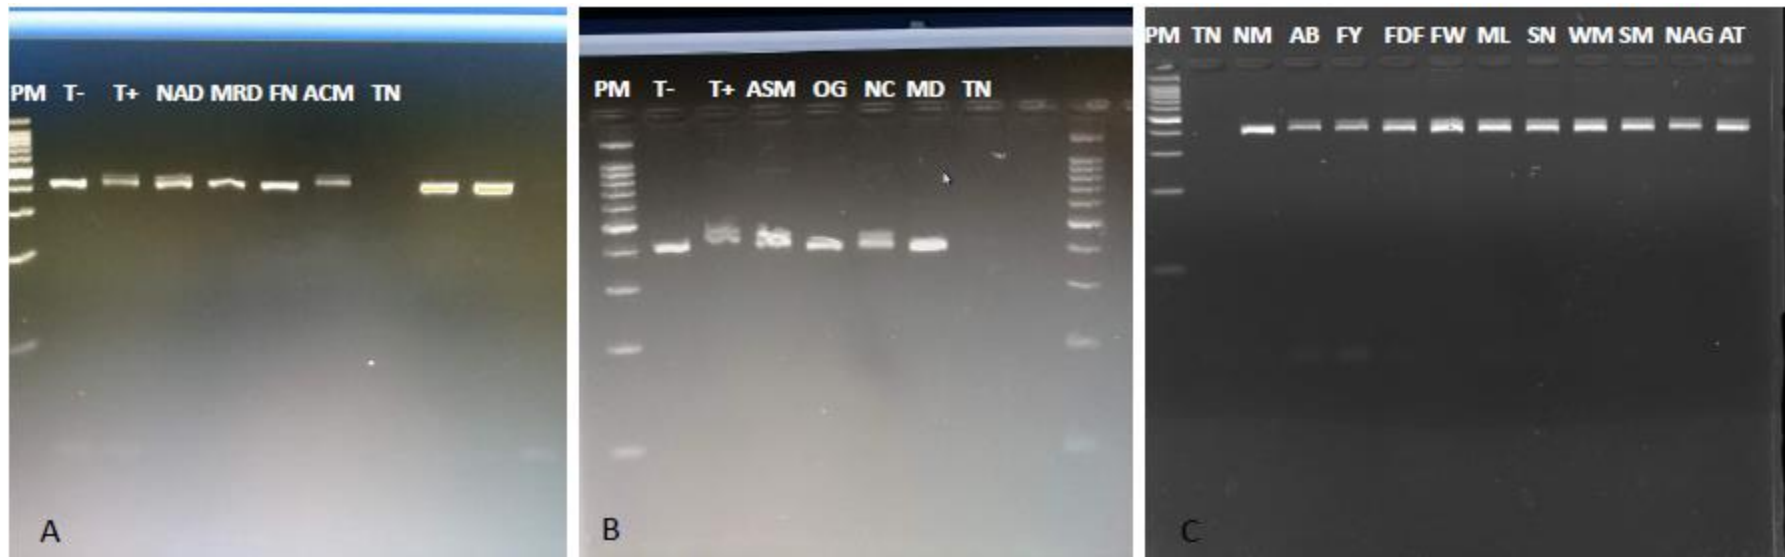

**Supplementary Figure 2:** Uncropped images of 4% agarose gel electrophoresis of PCR products from the 15 index cases carrying the pathogenic variant (Each gel derived from a single experiment)

**A:** NAD-ACM from the second group of 12 recruited index cases

**B:** ASM-OG-NC from the second group of 12 recruited index cases

**C:** AB-FY-FGF-FW-ML-AT from the first group of 15 recruited index cases and SN-WM-SM-NAG from the second group of 12 recruited index cases

**PM:** Molecular weight marker; **TN:** DNA negative control; **T-:** mutation non-carrier control; **T+:** Mutation carrier control
